# Supplementary material
Source: Springer Nature journal article supplement (https://www.springermedizin.de/resource/supplementary/12884_2013_854_MOESM1_ESM.pdf/9458354)

Number of deliveries  
Women age < 20 year

Number of deliveries  
All women

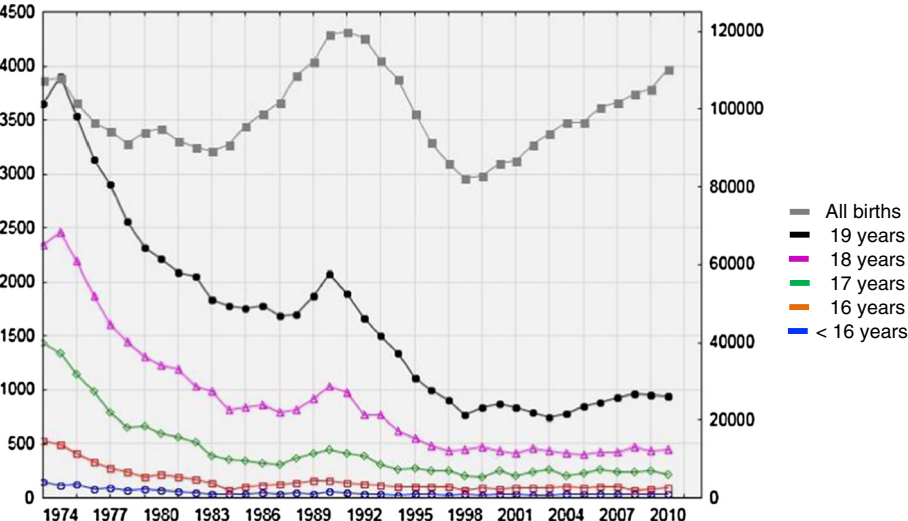

Supplement: MOESM1 [file 9458354]
